# Supplementary material for: The COSMO-CLM 4.8 regional climate model coupled to regional ocean, land surface and global earth system models using OASIS3-MCT: description and performance
Source: Copernicus journal article supplement (doi:10.5194/gmd-10-1549-2017), 2017-04-13
Supplement: Supplementary file 1 [file gmd-10-1549-2017-supplement.zip]

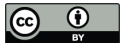

## *Supplement of*

# **The COSMO-CLM 4.8 regional climate model coupled to regional ocean, land surface and global earth system models using OASIS3-MCT: description and performance**

**Andreas Will et al.**

*Correspondence to:* Andreas Will (will@b-tu.de)

- gmd-10-1549-2017-supplement-title-page.pdf
- measurements
  - AUSWERTUNG.xlsx
  - all\_timings\_NEW.txt
  - cosmo\_s-a.txt
  - marimekko.dat
  - perfs\_clm.txt
  - perfs\_echam.txt
  - perfs\_nemo.txt
  - perfs\_reference.txt
  - perfs\_trim.txt
  - perfs\_veg3d\_alter.txt
  - perfs\_veg3d\_non-alter.txt

The copyright of individual parts of the supplement might differ from the CC-BY 3.0 licence.
